# Supplementary material for: Parallel molecular routes to cold adaptation in eight genera of New Zealand stick insects
Source: PubMed Central journal article supplement (PMC4564816; doi:10.1038/srep13965), 2015-09-10
Supplement: srep13965-s1.pdf [file srep13965-s1.pdf]

1 **Title:** Parallel molecular routes to cold adaptation in eight genera of New Zealand stick  
2 insects

3

4 **Authors:** Alice B. Dennis<sup>a,b,c,d\*</sup>, Luke T. Dunning<sup>a,b,e,f</sup>, Brent J. Sinclair<sup>g</sup>, Thomas R.  
5 Buckley<sup>a,b,e</sup>

6

7

## 8 **SUPPLEMENTARY MATERIAL**

9

10

11

### 12 **Details of Supplementary Information**

#### 13 **Supplementary Information**

14 Supplementary Methods: More detailed descriptions methods in the main manuscript.

15 Supplementary Table 1: Summary of species ranges, reproductive mode, and collection sites.

16 Supplementary Table 2: Full collection details for both RNA-seq and Physiology tests.

17 Supplementary Table 3: Summary of physiological testing.

18 Supplementary Table 4: Location and dates placed of environmental data loggers.

19 Supplementary Table 5: Summary of RNA-seq sequence data and de novo assemblies.

20 Supplementary Data 1: Summary of differential expression results from 3 statistical packages

21 Supplementary Data 2: Summary of *a priori* genes in all datasets, chosen based on best blast  
22 hit. Including, differential expression results and full details of blast results.

23 Supplementary Data 3: Summary of Fisher's Exact tests, and lists of all significantly  
24 differentially expressed GO terms for each species

25 Supplementary Data 4: Details of cuticular genes depicted in Fig. 3 and their blast results.

26

27

## 28 **Supplemental Methods**

29 These supplementary methods include additional information to the methods detailed in the  
30 main article. Citation numbers refer to the main article, and additional citation are named in  
31 text and listed alphabetically at the end of this section (Supplementary References).

32

### 33 Collections

34 Insects were collected at sites throughout New Zealand between January and April of 2011  
35 and 2012. Locales, altitudes and Crosby Codes (Crosby *et al.* 1998) for all collections are in  
36 Tables S1 and S2, and are mapped in Figure 1. Collections were made by either finding  
37 individual animals by eye or by beating vegetation. In all cases we used only mature, adult  
38 females. Animals whose RNA was extracted for Illumina sequencing were transported to  
39 Auckland in insulated containers and maintained in the lab at room temperature with an  
40 approximately 12:12 h light:dark cycles prior to treatment. During this time, insects were  
41 feed *ad libitum* on fresh *Rubus sp.*, *Muehlenbeckia sp.*, *Metrosideros excelsa*, *Lophomyrtus*  
42 *bullata* or *Hoheria sp.*, and were regularly misted with fresh water. For physiological trials,  
43 animals were transported live to the University of Otago in insulated containers and  
44 maintained for a minimum of seven days prior to treatment. Throughout these trials, they  
45 were maintained under controlled conditions at 18°C under 13:11 h light:dark cycle and fed  
46 *Rubus sp. ad libitum*.

47

### 48 Environmental Temperatures

49 Data loggers (iButton thermochron data loggers; CD1992L, Maxim-Dallas Semiconductor)  
50 were housed in rain covers made of c.40 mm deep plastic cups open at one end and placed at  
51 each collecting site to measure temperature at 1.5 h intervals during at least one winter season  
52 (Fig. 2, Supplementary Table 4 and detailed in Ref 24). Where leaf litter >10 cm deep was

53 present, loggers were placed in both the litter and in the canopy. Leaf litter has been shown to  
54 buffer temperature in these habitats and reduce the number of freezing events<sup>24</sup>, but these  
55 differences are not as great as those seen between sites. Thus, to broadly compare  
56 temperatures experienced at each site, we averaged all data loggers at each site. To depict  
57 winter lows in Figure 2, boxplots were constructed from all data recorded in the winter  
58 months (June- August). All calculations were performed in R<sup>68</sup>.

59

#### 60 Cold tolerance measurements: SCP and 6 h frozen

61 We determined the temperature at which ice formation was spontaneously initiated (the  
62 supercooling point SCP) in n= 105 individuals of ten species (n=4 - 40 per species,  
63 Supplementary Tables 2, 3). A 30-gauge Type-K thermocouple (Omega, Laval, QC, Canada)  
64 was held against the thorax of each individual between the middle and hind legs with a piece  
65 of flexible polymer putty (Blue Tack, Bostik, Auckland, New Zealand). The insect was then  
66 placed in a glass tube (ID 2cm) in a double-jacketed acrylic chamber cooled by a methanol-  
67 water mix circulated from a refrigerated circulator. The insects were held at +5 °C until their  
68 body temperature stabilized, and were then cooled at 0.25 °C/min. The thermocouple was  
69 connected to an electronic thermometer (HH309A, Omega), which interfaced to a computer  
70 which recorded data at 1 s intervals. The SCP was identified as the lowest temperature  
71 reached by each individual before the beginning of the exotherm (a measurable temperature  
72 rise) indicating the release of the latent heat of crystallization and freezing. Individuals were  
73 removed from the glass tube to room temperature (c. 20 °C) within 30 s of the initiation of  
74 freezing, marked individually and returned to plastic containers (1 L) for monitoring; the  
75 chamber was designed for individual removal upon freeze onset so that the period of freezing  
76 was not longer for some individuals, nor were neighbours disturbed by this removal. During  
77 this period, insects were maintained under the same controlled conditions and fed *Rubus sp.*

78 *ad libitum*. Survival was assessed after seven days and used to indicate whether individuals  
79 could survive a small amount of internal ice formation.

80       Because it can take several hours for ice formation to reach equilibrium in insects<sup>51</sup>,  
81 we determined whether individuals of each species could survive 6 h of the progression of  
82 internal ice formation (Figure 2, Supplemental Table 2, 3). Individuals (n=4 per species per  
83 run) were held in contact with a thermocouple and placed in a glass tube in a double-jacketed  
84 acrylic chamber cooled with circulating methanol-water solution, as above. Insects were held  
85 at +5 °C and then cooled at 0.25 °C/min until the initiation of freezing in the first individual;  
86 these batches were grouped by species and all individuals froze within a relatively short  
87 period (<5 minutes). The temperature ramp on the refrigerated circulator was then halted (the  
88 temperature of the stick insects then continued to decline for a few minutes), and insects were  
89 held at that temperature for 6 h before rewarming at 0.25 °C/min. Survival was monitored as  
90 above. During these runs, 93 of the 95 individuals we tested froze; the two exceptional  
91 individuals were *M. nov. sp. 2* collected from Mt. Arthur and were excluded from further  
92 analyses.

93       To calculate the SCP for each locale/species, we used both the specific tests to  
94 measure supercooling point and the supercooling points observed during the 6 h trials, but  
95 only in instances where supercooling was observed during the bath's temperature decline.

96

#### 97 Cold treatments for RNA-seq

98 Cold-chock treatments of all individuals used in RNA sequencing were conducted at  
99 Landcare Research, Auckland, New Zealand. Cold treatments were conducted in a Sanyo  
100 MIR-154 (Sanyo Scientific, Bensenville, IL, USA) cooled incubator and have been  
101 previously described by Dunning *et. al.*<sup>21</sup>. In all treatments, stick insects were placed in  
102 empty, dry plastic containers and left to settle for about one hour. Cold shocked individuals

103 were placed in a +21 °C incubator and held for 10-15 minutes prior to cooling to -5 °C at  
104 approximately 1 °C per minute. The one hour treatment began when the air temperature in the  
105 incubator reached -5 °C, and was followed by a period of warming to +21 °C. Once the  
106 incubator had reached +21 °C, insects were held for one hour before immediate snap freezing  
107 at -80 °C freezer. Control individuals were treated on the same day by placing containers in  
108 the incubator at 21 °C for two hours before immediate freezing at -80 °C.

109

#### 110 RNA extraction and library preparation

111 All samples were stored at -80 °C until extraction. For all species, cDNA libraries were  
112 constructed from between 6 and 12 individual stick insects (Supplement Table 5). RNA was  
113 extracted from the head, prothorax and antennae only. Tissue was ground in liquid nitrogen  
114 and extracted using Trizol reagent (Invitrogen, Carlsbad, CA, cat #15596) according to the  
115 manufacturer's instructions, with the following modifications: ground samples were  
116 incubated overnight at room temperature in Trizol, and ethanol precipitations were incubated  
117 overnight at +4 °C. Products of Trizol extraction were subsequently spin column purified  
118 using the RNeasy mini kit (Qiagen, Venlo, Netherlands, cat # 74104). Purified total RNA was  
119 verified on an Agilent 2100 Bioanalyzer (Agilent Technologies, Santa Clara, CA, USA) and  
120 quantified with a Nanodrop 2000 spectrophotometer (Thermo Scientific, Wilmington, DE,  
121 USA).

122 All cDNA libraries were prepared using the Illumina TruSeq RNA kit (v1/ Cat# FC-  
123 121-1001 for *Micrarchus*<sup>21</sup>, v2/ Cat # RS-122-2001 for all other species) with an input of  
124 approximately 2.5 µg of total RNA. In all cases, the PCR amplification step of the protocol  
125 was performed for 12 cycles. Library quality was verified using a Bioanalyzer prior to sample  
126 quantification and sequencing at the High Throughput Genomics Core Facility at the  
127 Huntsman Cancer Institute, University of Utah, with 8 – 18 individuals per flow cell lane.

128 Sequence clean-up and assembly

129 Prior to assembly, raw Illumina reads were filtered to retain only high quality sequences in  
130 several steps. To remove sequences more likely to contain errors, all reads containing an ‘N’  
131 were discarded using ShortRead v1.16.3<sup>55</sup> implemented in R. Low quality (phred score < 30)  
132 and Illumina primer sequences were then trimmed using Cutadapt v1.1<sup>53</sup>. Lastly, polyT  
133 stretches on sequence ends were trimmed using PRINSEQ lite v 0.6<sup>54</sup> and remaining reads  
134 shorter than 25bp were discarded. The quality of each individual library before and after  
135 clean-up was verified using FastQC v 0.10.1<sup>56</sup>.

136 For each species, *de novo* assembly was conducted separately using Trinity  
137 v10.05.2012<sup>57</sup> with the default settings and the -REDUCE flag. The two populations of *M.*  
138 nov sp. 2 (Mt. Arthur and Sewell Peak) were aligned separately because of their higher levels  
139 of divergence and different mitochondrial DNA background<sup>21</sup>. The alignment for *N. annulata*  
140 was jointly constructed using 6 individuals from the Remarkables, 6 individuals from  
141 Dunedin, and 9 individuals from Nevis Rd. (manuscript containing these data in prep). In all,  
142 this resulted in 11 *de novo* transcriptome assemblies, each constructed from between 6 and 21  
143 individuals (Supplemental Tables 5).

144 To reduce an apparent overabundance of called splice variants, the resulting  
145 transcripts were clustered using CD-HIT-EST<sup>58</sup>, which combined all contigs with > 95%  
146 similarity. During library preparation, removal of ribosomal RNA could be both incomplete  
147 and unequal among samples. To remove this bias among libraries, ribosomal sequences were  
148 removed by Ribopicker online<sup>59</sup>. However, not all sequences were removed and in some  
149 cases 12S, 16S and 28S were manually identified by blast and removed from the assembly.  
150 The resulting number of contigs, as well as their N50 and N90, are listed in Supplemental  
151 Table 5.

152 Assemblies were annotated by a BlastX<sup>60</sup> sequence search (e-value threshold  $1e^{-10}$ )  
153 against the National Centre for Biotechnology Information (NCBI) non-redundant (*nr*)  
154 database. Approximately 10% of all contigs were annotated this way, but that number was  
155 higher (~25%) when only contigs > 200 bp were retained. However, to maximize  
156 comparisons among datasets, 100-200bp long contigs were retained in all analyses. Gene  
157 ontology (GO) terms were assigned using Blast2GO<sup>38</sup> based on the BlastX results.

158 To determine the overall similarity among the transcripts sequenced across species,  
159 pairwise blasts with  $1e^{-10}$  e-value threshold were conducted among each of the Trinity  
160 alignments. Based on this, all alignments shared more than 99% of their transcripts with one  
161 another (results not shown). To search for *a priori* genes (Supplementary Dataset 3), we  
162 assembled a list of candidate genes from several sources<sup>35-38</sup> and retrieved all matches to  
163 these in the top blast hit from the Blastx results (above).

164

#### 165 Phylogenetic relationships among NZ stick insects

166 Orthologs used in phylogenetic analyses were extracted from each species' Trinity assembly  
167 using HaMStr<sup>61</sup>, which was kindly run by I. Ebersberger using a core ortholog set containing  
168 2,423 orthologs built based on reference genomes in six arthropod taxa: *Daphnia pulex*,  
169 *Acyrtosiphon pisum*, *Pediculus humanus*, *Bombyx mori*, *Apis mellifera*, and *Drosophila*  
170 *melanogaster*. Recovery of orthologs was high across taxa; 2,336 of core orthologs were  
171 detected in at least one dataset. Of these, 1,485 were found in all 11 datasets. However, many  
172 of these genes were not full length across all taxa, so we retained only genes which were  
173 missing less than 2% of their nucleotides (due to both gaps and missing data). The remaining  
174 genes were aligned using MAFFT v.7.047beta<sup>62</sup> with a maximum of 1000 iterations and the -  
175 -localpair setting. This resulted in 274 genes (200,379 base pairs, bp) that were concatenated  
176 used for phylogenetic analysis.

177           These 274 genes were concatenated, providing a total 200,279 bp for analysis.  
178 Concatenating the sequences made analysis of this large dataset possible, it is also unlikely to  
179 affect the species-level relationships we are interested in here<sup>65,66</sup>. Bayesian phylogenies were  
180 constructed separately for both nucleotide sequences, partitioned by codon, and amino acid  
181 sequences using Markov-chain Monte Carlo (MCMC) sampling in MrBayes v. 3.2.1<sup>63,64</sup> for 3  
182 million generations, sampled every thousand. A relative burn-in of 25% was used with the  
183 following priors: exponentially distributed substitution rates, unconstrained branch lengths,  
184 empirically estimated state frequencies, exponential gamma shape parameter set to five for  
185 among-site rate variation and proportion of invariable sites uniformly distributed between  
186 zero and one. Each data set was analysed in three independent runs for both the nucleotide  
187 and amino acid dataset. Likelihood bootstrap values were generated in Garli<sup>65</sup> using a  
188 partitioned model with separate GTR+I+G models for each codon position and 100 bootstrap  
189 replicates with one search replicate per bootstrap.

190

#### 191 Differential expression analysis of Illumina data

192 As in all analyses, these calculations were performed separately for each Trinity alignment.  
193 To generate expression counts for each Trinity contig, raw reads for each individual were  
194 mapped back onto the assemblies using Bowtie2<sup>66</sup> with the '-sensitive' configuration. Raw  
195 counts were generated for each individual using HTSeq-count<sup>67</sup>, run against .gff files  
196 generated by Cufflinks (Trapnell *et al.* 2012). Calculations of differential expression were  
197 similar to previously published methods<sup>21</sup>. Differentially expression genes were identified  
198 using three packages implemented in R. First, edgeR<sup>30</sup> was run using tagwise dispersal  
199 estimates and a cut-off of  $p < 0.05$ . Second, baySeq<sup>32</sup> was run using the corrected counts  
200 generated by edge R and a cut-off of likelihood  $< 0.7$ . Lastly, DESeq<sup>31</sup> was run using  
201 recommended settings and cut-off of  $p < 0.1$ . In all cases, contigs were only considered for



202 differential expression analysis if they had at least one count per million mapped reads and  
203 were present in at least half of the samples (three individuals in all cases except *M. nov. sp. 2*  
204 Mt Arthur, where six control and 6 treatment insects were measured). The resulting lists  
205 of significantly differentially expression genes for each species (Supplement Data 2) was  
206 compiled by combining the results from each package, and removing redundant contigs  
207 (produced by more than one package). Contigs with infinite fold change were retained (i.e.  
208 those with zero counts in all members of one treatment). There was generally more overlap  
209 among the outputs of baySeq and edgeR than either package with DESeq. Enrichment for GO  
210 terms was tested using a Fisher's exact test, implemented in Blast2GO. In this, we tested for  
211 GO terms associated with the genes significantly up-regulated in the cold against all other  
212 genes identified in the transcriptomes (Supplementary Data 3).

213

#### 214 Orthologous cuticle genes and tests of selection

215 Based on the results of the Fisher's exact test, genes in the GO category "structural  
216 constituent of cuticle" were the only annotated genes to be significantly (FDR < 0.05)  
217 differentially expressed in more than one species. To further investigate this, we extracted all  
218 genes annotated to this GO category from the individual *de novo* transcriptome assemblies  
219 (based on their GO assignment in Blast2GO). To identify orthologs, pairwise comparisons  
220 were made between these "structural constituent of cuticle" genes from each dataset using  
221 reciprocal blast and manual curation. Particular attention was paid to sorting orthologs with  
222 the same annotation. Each ortholog was aligned in Geneious (Geneious version 6.1.7) using  
223 ClustalW (Larkin *et al.* 2007), and the alignments were then manually inspected, phased, and  
224 trimmed of untranslated regions (UTR). Despite their groupings using reciprocal blast,  
225 several sequences were obviously not orthologous and either some individuals or the entire  
226 sequence was removed from the alignment. Genes were also not retained if they were present

227 in less than 5 species, if they were < 200bp in length, or if they could not be phased. For the  
228 remaining 17 genes, now arbitrarily named Orth 1 -17, we generated a heatmap (Figure 3)  
229 depicting the log<sub>2</sub>fold change of that gene each species, as calculated by DESeq.

230 To detect patterns of selection on structural cuticular genes, alignments of orthologous  
231 genes were analysed in the CODEML package of PAML<sup>42</sup>. For all comparisons, we used the  
232 phylogenetic tree produced by the 274 genes described above (Figure 1); in cases with fewer  
233 than the full 11 taxa, missing branches were removed and an unrooted tree was exported in  
234 Mesquite (Maddison& Maddison 2011). We implemented two separate sets of analyses to  
235 look for patterns of selection in these genes across the phylogeny of NZ stick insects. To  
236 detect amino acid sites under selection, we compared two site models: M1a vs. M2a and M7  
237 vs M8. To identify positive selection on amino acids within a particular lineage, we  
238 implemented the branch-site model test in four different independent runs. Each run was  
239 starred one of the following different foreground branches: to test for selection associated  
240 with occurrence in montane and colder high latitudes, we tested (1) the *Micrarchus* clade, (2)  
241 the *N. annulata* branch, and (3) the *T. salebrosus* branch. In association with colonization of  
242 cooler habitats we tested (4) the *S. annulata* branch (separating *S. annulata* from all other  
243 species). In all cases, the Bayes Empirical Bayes (BEB) method was used to identify sites  
244 under selection.

245 **Supplementary References**

246

247 Crosby TK, Dugdale JS, Watt JC (1998) Area codes for recording specimen localities in the  
248 New Zealand subregion. *N.Z. J. Zoo.* **25**, 175-183.

249 Geneious (version 6.1.7) Geneious v6.1.7 created by Biomatters. Available from  
250 <http://www.geneious.com/>.

251 Larkin MA, Blackshields G, Brown NP, *et al.* (2007) Clustal W and Clustal X version 2.0.  
252 *Bioinformatics* **23**, 2947-2948.

253 Maddison WP, Maddison DR (2011) Mesquite: a modular system for evolutionary analysis.  
254 Version 2.75 <http://mesquiteproject.org>.

255 Trapnell C, Roberts A, Goff L, *et al.* (2012) Differential gene and transcript expression  
256 analysis of RNA-seq experiments with TopHat and Cufflinks. *Nat. Protocols* **7**, 562-  
257 578.

258

| Species                          |                                                                                                            | Collection locale                                |             |                   |          |           |           |
|----------------------------------|------------------------------------------------------------------------------------------------------------|--------------------------------------------------|-------------|-------------------|----------|-----------|-----------|
| Species                          | Geographic range summary                                                                                   | Locale                                           | Crosby code | Reproductive mode | Latitude | Longitude | Altitude  |
| North                            |                                                                                                            |                                                  |             |                   |          |           |           |
| <i>Spinotectarchus acornutus</i> | Northern NI, lowland habitats <sup>a</sup>                                                                 | <b>Waitakere</b> Ranges, Auckland                | AK          | Sex               | 36° 52.1 | 174° 28.0 | 0-474     |
| <i>Asteliaphasma jucundum</i>    | Northern NI, lowland habitats <sup>a</sup>                                                                 | <b>Waitakere</b> Ranges, Auckland                | AK          | Sex               | 36° 52.1 | 174° 28.0 | 0-474     |
| <i>Clitarchus hookeri</i>        | Lowland throughout NI & eastern SI. Obligate parthenogenic populations more common in the south [16]       | <b>Auckland</b> Botanical Gardens                | AK          | Sex               | 37° 0.0  | 174° 54.8 | 75-100    |
| <i>Acanthoxyla sp.</i>           | Lowland NI & SI. Obligate parthenogen [76]                                                                 | <b>Auckland</b> Botanical Gardens                | AK          | Asex              | 37° 00.4 | 174° 54.2 | 75        |
| <i>Tectarchus ovobessus</i>      | Mid to southern NI and northern SI. Lowland to 1000 m a.s.l. <sup>a</sup>                                  | <b>Paengaroa</b> Scenic Reserve, Taihape         | RI          | Sex               | 39° 38.8 | 175° 42.6 | 517-540   |
| <i>Argosarchus horridus</i>      | Lowland NI & SI. Obligate parthenogenic populations more common in the south [17]                          | <b>Paengaroa</b> Scenic Reserve, Taihape         | RI          | Sex               | 39° 38.8 | 175° 42.6 | 517-540   |
| <i>Micrarchus hystriculeus</i>   | Southern NI & northern SI. Lowland to 970 m a.s.l. [20]                                                    | <b>Paengaroa</b> Scenic Reserve, Taihape         | RI          | Sex               | 39° 38.8 | 175° 42.6 | 517-540   |
| <i>Micrarchus nov sp 1</i>       | Northeastern SI. Lowland to 1100 m a.s.l. [20]                                                             | <b>Puhipuhi</b> Scenic Reserve, Kaikoura         | KA          | Sex               | 42° 14.2 | 173° 45.1 | 241       |
| <i>Micrarchus nov sp 2</i>       | Obligate to altitudes at or above tree line, found on northwest SI between 640 and 1400 m a.s.l. only [20] | <b>Mt. Arthur</b> , Kahurangi National Park      | NN          | Sex               | 41° 11.9 | 172° 42.7 | 1336-1347 |
| <i>Micrarchus nov sp 2</i>       |                                                                                                            | <b>Sewell Peak</b> , Paparoa National Park       | BR          | Sex               | 42°24.3' | 171°20.6  | 749-822   |
| <i>Tectarchus salebrosus</i>     | Sea level to high altitude 1100 m a.s.l. <sup>a</sup>                                                      | Kennedy's Bush, <b>Port Hills</b> , Christchurch | MC          | Sex               | 43° 37.9 | 172° 37.5 | 420       |

|                             |                                                                                                                                                     |                                          |    |      |          |           |          |
|-----------------------------|-----------------------------------------------------------------------------------------------------------------------------------------------------|------------------------------------------|----|------|----------|-----------|----------|
| <i>Niveaphasma annulata</i> |                                                                                                                                                     | <b>Ohau</b> , Mackenzie Basin            | MK | Sex  | 44° 14.5 | 169° 48.2 | 780-980  |
| <i>Niveaphasma annulata</i> |                                                                                                                                                     | <b>Remarkables</b> , Otago*              | CO | Asex | 45° 01.7 | 168° 47.0 | 930-1031 |
| <i>Niveaphasma annulata</i> | Mid to southern SI only. Broadly occurs from sea level to above tree line (1,000 m a.s.l.). Some high altitude populations are parthenogenetic [19] | <b>Nevis</b> , Bannockburn, Otago*       | CO | Asex | 45° 09.3 | 169° 07.6 | 904      |
| <i>Niveaphasma annulata</i> |                                                                                                                                                     | <b>Dunedin</b> , Leith Valley            | DN | Sex  | 45° 51.0 | 170° 30.3 | 49       |
| <i>Niveaphasma annulata</i> |                                                                                                                                                     | <b>Seward Moss</b> , Southland           | SL | Sex  | 46° 32.5 | 168° 26.0 | 9        |
| <i>Niveaphasma annulata</i> |                                                                                                                                                     | <b>Papatowai</b> , Old Coach Rd. Catlins | SL | Sex  | 46° 33.2 | 169° 28.5 | 0        |
| <i>Niveaphasma annulata</i> |                                                                                                                                                     | South                                    |    |      |          |           |          |

**Supplementary Table 1.** Summaries of each species' entire ranges and the specific collection locales used in this study. Latitude, longitude and altitude taken from handheld GPS devices, Crosby Codes from Crosby (Supplementary Ref 1). Range summary indicates general features of entire species range. NI = North Island, SI = South Island. Reproductive mode denotes either entirely parthenogenetic populations (asex), or those in which males have been observed (sex). Bracketed referenced refer to those in main text. <sup>a</sup> Records from New Zealand Arthropod Collection, Landcare Research, Auckland, New Zealand

**Additional Reference:**

[76] Buckley, Thomas R., Dilini Attanayake, Duckchul Park, Shanthinie Ravindran, Tony R. Jewell, Benjamin B. Normark. 2008. Investigating hybridization in the parthenogenetic New Zealand stick insect *Acanthoxyla* (Phasmatodea) using single-copy nuclear loci. *Mol Phylogenet Evol.* 48:335–349

| Species                          | Locale                                           | Collections for RNA-seq |              |             | Collections for Physiology |        |       |
|----------------------------------|--------------------------------------------------|-------------------------|--------------|-------------|----------------------------|--------|-------|
|                                  |                                                  | Date collected          | Date treated | n, Illumina | Date collected             | n, SCP | n, 6h |
| <b>North</b>                     |                                                  |                         |              |             |                            |        |       |
| <i>Spinotectarchus acornutus</i> | <b>Waitakere</b> Ranges, Auckland                | Jan-Feb 2012            | 5 Apr 2012   | 6           | Jan- Feb 2012              | 8      | 4     |
| <i>Asteliaphasma jucundum</i>    | <b>Waitakere</b> Ranges, Auckland                | Jan- Feb 2012           | 3 Apr 2012   | 6           | Jan- Feb 2012              | 8      | 4     |
| <i>Clitarchus hookeri</i>        | <b>Auckland</b> Botanical Gardens                | 9- 11 Feb 2011          | 15 Feb 2011  | 6           | 17 Feb 2012                | 7      | 4     |
| <i>Acanthoxyla sp.</i>           | <b>Auckland</b> Botanical Gardens                | 10 Apr 2012             | 12 Apr 2012  | 6           | 3-10 April 2012            | 8      | 4     |
| <i>Tectarchus ovobessus</i>      | <b>Paengaroa</b> Scenic Reserve, Taihape         | 13 Apr 2012             | 24 Apr 2012  | 6           | 23-26 Jan 2012             | 5      | 4     |
| <i>Argosarchus horridus</i>      | <b>Paengaroa</b> Scenic Reserve, Taihape         | 25 Mar 2011             | 1 Aug 2011   | 6           | 13-15 April 2012           | 5      | 4     |
| <i>Micrarchus hystriculeus</i>   | <b>Paengaroa</b> Scenic Reserve, Taihape         | 25 Mar 2011             | 11 May 2011  | 6           | 23-26 Jan 2012             | 4      | 4     |
| <i>Micrarchus nov sp 1</i>       | <b>Puhipuhi</b> Scenic Reserve, Kaikoura         |                         |              |             | 15 Jan 2012                | 4      | 4     |
| <i>Micrarchus nov sp 2</i>       | <b>Mt. Arthur</b> , Kahurangi National Park      | 13 Feb 2011             | 17 Mar 2011  | 12          | 23 Jan 2012                | 4      | 6     |
| <i>Micrarchus nov sp 2</i>       | <b>Sewell Peak</b> , Paparoa National Park       | 11 Feb 2011             | 17 Mar 2011  | 6           |                            |        |       |
| <i>Tectarchus salebrosus</i>     | Kennedy's Bush, <b>Port Hills</b> , Christchurch | 23 Feb 2012             | 3 May 2012   | 6           | 23 Feb 2012                | 8      | 4     |
| <i>Niveaphasma annulata</i>      | <b>Ohau</b> , Mackenzie Basin                    |                         |              |             | 25-26 Feb 2012             |        | 4     |
| <i>Niveaphasma annulata</i>      | <b>Remarkables</b> , Otago*                      | 27 Feb 2011             | 25 Mar 2011  | 6           | 28 Feb 2012                |        | 7     |
| <i>Niveaphasma annulata</i>      | <b>Nevis</b> , Bannockburn, Otago*               |                         |              |             | 27 Feb 2012                | 8      | 4     |
| <i>Niveaphasma annulata</i>      | <b>Dunedin</b> , Leith Valley                    | 4 Mar 2011              | 25 Mar 2011  | 6           | 3 Mar 2012                 | 8      | 6     |
| <i>Niveaphasma annulata</i>      | <b>Seward Moss</b> , Southland                   |                         |              |             | 29 Feb 2012                | 8      | 4     |
| <i>Niveaphasma annulata</i>      | <b>Papatowai</b> , Old Coach Rd. Catlins         |                         |              |             | 1 Mar 2012                 | 8      | 4     |
| <b>South</b>                     |                                                  |                         |              |             |                            |        |       |

**Supplementary Table 2.** Full collection details of all samples used in both RNAseq following cold shock and physiological tests.

| Species                          | Locale           | Supercooling point (SCP) | SCP survival (%) | Number SCP | 6 h freeze survival (%) | Number 6 h freeze |
|----------------------------------|------------------|--------------------------|------------------|------------|-------------------------|-------------------|
| <i>Spinotectarchus acornutus</i> | Waitakere Ranges | -4.4                     | 38               | 8          | 0                       | 4                 |
| <i>Asteliaphasma jucundum</i>    | Waitakere Ranges | -3.7                     | 88               | 8          | 0                       | 4                 |
| <i>Clitarchus hookeri</i>        | Auckland         | -2.9                     | 71               | 7          | 0                       | 4                 |
| <i>Acanthoxyla sp.</i>           | Auckland         | -4.4                     | 75               | 8          | 0                       | 4                 |
| <i>Tectarchus ovobessus</i>      | Paengaroa        | -3.8                     | 80               | 5          | 0                       | 4                 |
| <i>Argosarchus horridus</i>      | Paengaroa        | -4.8                     | 80               | 5          | 0                       | 4                 |
| <i>Micrarchus hystriculeus</i>   | Paengaroa        | -5.6                     | 50               | 4          | 25                      | 4                 |
| <i>Micrarchus nov sp 1</i>       | Puhipuhi         | -5.8                     | 0                | 4          | 0                       | 4                 |
| <i>Micrarchus nov sp 2</i>       | Mt. Arthur       | -4.4                     | 100              | 4          | 33                      | 6                 |
| <i>Tectarchus salebrosus</i>     | Port Hills       | -4.5                     | 100              | 8          | 75                      | 4                 |
| <i>Niveaphasma annulata</i>      | Ohau             | -2.8                     | n.d.             | n.d.       | 75                      | 4                 |
| <i>Niveaphasma annulata</i>      | Nevis            | -2.6                     | 88               | 8          | 75                      | 4                 |
| <i>Niveaphasma annulata</i>      | Dunedin          | -4.8                     | 100              | 8          | 0                       | 6                 |
| <i>Niveaphasma annulata</i>      | Remarkables      | -2.4                     | n.d.             | n.d.       | 43                      | 7                 |
| <i>Niveaphasma annulata</i>      | Seward Moss      | -2.7                     | 75               | 8          | 100                     | 4                 |
| <i>Niveaphasma annulata</i>      | Papatowai        | -3.8                     | 100              | 8          | 100                     | 4                 |

**Supplementary Table 2:** Summary of physiological measures of supercooling point (SCP) and survival of 6 hours frozen (6hr). Survival was recorded for up to 7 days (7d); 1 indicates survival, 0 indicates death. Supercooling points reported in Figure 2 include both SCP and 6 h tests where freezing occurred during the temperature decline.

| Location                                         | Placement                 | Number<br>ibuttons | Species present                                                                                                                        | Elevation<br>(m) | Date<br>placed         | Date<br>removed | Latitude   | Longitude   | Mean<br>Temp.<br>(°C) | Min.<br>Temp.<br>(°C) |
|--------------------------------------------------|---------------------------|--------------------|----------------------------------------------------------------------------------------------------------------------------------------|------------------|------------------------|-----------------|------------|-------------|-----------------------|-----------------------|
| North                                            |                           |                    |                                                                                                                                        |                  |                        |                 |            |             |                       |                       |
| Matuku Reserve, <b>Waitakere</b> Ranges          | Canopy and Litter         | 5                  | <i>Asteliaphasma</i> ,<br><i>Spinotectarchus</i> , <i>Clitarchus</i>                                                                   | 0-474            | 2/04/2012              | 4/09/2013       | 36° 52.1 S | 174° 28.0 E | 13.1                  | -0.4                  |
| Huia, <b>Waitakere</b> Ranges                    | Canopy (3) and Litter (3) | 6                  | <i>Asteliaphasma</i> ,<br><i>Spinotectarchus</i> , <i>Clitarchus</i>                                                                   | 0-474            | 9/5/2011 &<br>2/4/2012 | 4/09/2013       | 36° 52.1 S | 174° 28.0 E | 14.5                  | 0.6                   |
| <b>Auckland</b> Botanical Gardens                | Canopy (4) and Litter (1) | 5                  | <i>Acanthoxyla</i>                                                                                                                     | 75-100           | 27/04/2012             | 4/11/2013       | 37° 0.0 S  | 174° 54.8 E | 14.1                  | -2.4                  |
| <b>Paengaroa</b> Scenic Reserve, Taihape         | Canopy (3) and Litter (3) | 6                  | <i>Acanthoxyla</i> , <i>Argosarchus</i> ,<br><i>Clitarchus</i> , <i>Micrarchus</i><br><i>hystericuleus</i> , <i>Tectarchus huttoni</i> | 517-540          | 27/3/2011              | 3/06/2013       | 39° 38.8 S | 175° 42.6 E | 8.3                   | -5.5                  |
| <b>Puhipuhi</b> Scenic Reserve, Kaikoura         | Canopy (3) and Litter (3) | 6                  | <i>Micrarchus</i> nov. sp. 1                                                                                                           | 241              | 19/7/11                | 14/01/2012      | 42° 14.2 S | 173° 45.1 E | 9.6                   | -2.5                  |
| <b>Mt. Arthur</b> , Kahurangi National Park      | Canopy (3) and Litter (3) | 6                  | <i>Micrarchus</i> nov. sp. 2                                                                                                           | 1336-1347        | 15/2/11                | 22/1/12         | 41° 11.9 S | 172° 42.7 E | 5.2                   | -5.5                  |
| <b>Sewell Peak</b> , Paparoa National Park       | Canopy (3) and Litter (3) | 6                  | <i>Micrarchus</i> nov. sp. 2                                                                                                           | 749-822          | 13/2/11                | 26/1/12         | 42°24.3 S  | 171°20.6 E  | 7.5                   | -6.0                  |
| Kennedy's Bush, <b>Port Hills</b> , Christchurch | Canopy and Litter         | 4                  | <i>Tectarchus salebrosus</i> ,<br><i>Argosarchus</i>                                                                                   | 893              | 24/02/2012             | 2/02/2013       | 43° 37.9 S | 172° 37.5 E | 9.8                   | -2.5                  |



|                                                |                              |   |                                                                    |          |            |            |            |             |     |       |
|------------------------------------------------|------------------------------|---|--------------------------------------------------------------------|----------|------------|------------|------------|-------------|-----|-------|
| <b>Ohau,</b><br>Mackenzie<br>Basin             | In plant near<br>ground      | 3 | <i>Niveaphasma annulata</i>                                        | 780- 980 | 28/02/2011 | 25/02/2012 | 44° 14.5 S | 169° 48.2 E | 9.1 | -6.0  |
| <b>Remarkables,</b><br>Otago                   | In plant near<br>ground      | 3 | <i>Niveaphasma annulata</i>                                        | 930-1031 | 28/02/2011 | 3/03/2013  | 45° 01.7 S | 168° 47.0 E | 8.7 | -5.0  |
| <b>Nevis,</b><br>Bannockburn,<br>Otago         | Canopy (3) and<br>Litter (3) | 6 | <i>Niveaphasma annulata</i>                                        | 904      | 28/02/2011 | 3/03/2013  | 45° 09.3 S | 169° 07.6 E | 7.5 | -8.0  |
| <b>Dunedin,</b> Leith<br>Valley                | In plant near<br>ground      | 2 | <i>Acanthoxyla, Argosarchus,</i><br><i>Clitarchus, Niveaphasma</i> | 49       | 5/03/2011  | 14/02/2013 | 45° 51.0 S | 170° 30.3 E | 9   | -0.9  |
| <b>Seward Moss,</b><br>Southland               | Canopy (3) and<br>Litter (3) | 6 | <i>Niveaphasma annulata</i>                                        | 9        | 1/03/2011  | 3/03/2013  | 46° 32.5 S | 168° 26.0 E | 9.5 | -11.6 |
| <b>Papatowai,</b> Old<br>Coach Rd.,<br>Catlins | Canopy (3) and<br>Litter (3) | 6 | <i>Niveaphasma annulata</i>                                        | 0        | 4/03/2011  | 3/03/2013  | 46° 33.2 S | 169° 28.5 E | 9.3 | -2.9  |
| South                                          |                              |   |                                                                    |          |            |            |            |             |     |       |

**Supplemental Table 4:** Location and placement dates of ibutton data loggers, and species that occur at that locale. Temperature was measured every 1.5 hours.

| <b>Species</b>                   | <b>Locale</b>    | <b>Number of Individuals</b> | <b>Number of Clean Reads</b> | <b>Clean <i>de novo</i> contigs</b> | <b>Longest Contig</b> | <b>N50 (bp)</b> | <b>N90 (bp)</b> |
|----------------------------------|------------------|------------------------------|------------------------------|-------------------------------------|-----------------------|-----------------|-----------------|
| <i>Spinotectarchus acornutus</i> | Waitakere Ranges | 6                            | 57,145,451                   | 100,486                             | 25,298                | 389             | 120             |
| <i>Asteliaphasma jucundum</i>    | Waitakere Ranges | 6                            | 56,981,479                   | 88,628                              | 17,151                | 467             | 122             |
| <i>Clitarchus hookeri</i>        | Auckland         | 6                            | 58,148,764                   | 84,307                              | 23,840                | 519             | 123             |
| <i>Acanthoxyla sp.</i>           | Auckland         | 6                            | 67,462,015                   | 122,965                             | 26,075                | 472             | 121             |
| <i>Tectarchus ovobessus</i>      | Paengaroa        | 6                            | 64,093,476                   | 105,278                             | 26,532                | 618             | 125             |
| <i>Tectarchus salebrosus</i>     | Port Hills       | 6                            | 55,285,976                   | 70,268                              | 10,789                | 519             | 123             |
| <i>Argosarchus horridus</i>      | Paengaroa        | 6                            | 62,510,873                   | 86,970                              | 25,983                | 588             | 125             |
| <i>Micrarchus hystriculeus</i>   | Paengaroa        | 6                            | 56,471,214                   | 116,516                             | 16,697                | 370             | 118             |
| <i>Micrarchus nov. sp. 2</i>     | Mt. Arthur       | 12                           | 118,263,415                  | 177,668                             | 14,290                | 439             | 120             |
| <i>Micrarchus nov. sp. 2</i>     | Sewell Peak      | 6                            | 59,833,254                   | 124,050                             | 14,995                | 414             | 120             |
| <i>Niveaphasma annulata</i>      | Remarkables      | 6                            | 71,340,806                   |                                     |                       |                 |                 |
| <i>Niveaphasma annulata</i>      | Dunedin          | 6                            | 60,767,621                   | 193,845*                            | 37,991                | 581             | 122             |

**Supplemental Table 5:** Summary of Illumina sequencing of cDNA libraries and separate *de novo* assemblies of these for each species. “Clean *de novo* Contigs” are the results of individual alignments in Trinity and subsequent processed (see Methods). \*Joint *Niveaphasma* alignment includes both locales reported here (Dunedin and Remarkables), plus 94,655,424 reads from 9 individuals collected at Nevis Rd. (manuscript in prep.).

| SITE MODELS |      |        |                |        |               |              |         |         |         |                    | BRANCH SITE MODELS |                        |                    |                   |                    |                    |                    |                      |                    |
|-------------|------|--------|----------------|--------|---------------|--------------|---------|---------|---------|--------------------|--------------------|------------------------|--------------------|-------------------|--------------------|--------------------|--------------------|----------------------|--------------------|
| Gene        | bp   | n Taxa | $\theta$       | k (M0) | $\omega$ (M0) | 2 $\Delta$ I |         |         |         | Sig aa sites (BEB) |                    | <i>Spinotectarchus</i> |                    | <i>Micrarchus</i> |                    | <i>Niveaphasma</i> |                    | <i>T. salebrosus</i> |                    |
|             |      |        |                |        |               | M0:M3        | M1a:M2a | M7:M8   | M8:M8a  | M8                 | M2a                | 2 $\Delta$ I           | Sig aa sites (BEB) | 2 $\Delta$ I      | Sig aa sites (BEB) | 2 $\Delta$ I       | Sig aa sites (BEB) | 2 $\Delta$ I         | Sig aa sites (BEB) |
| Orth15      | 1083 | 11     | 0.03           | 2.24   | 0.27          | 48.32**      | 3.00    | 3.92    | 2.94    | 3*                 |                    | 0                      | 0                  | 14.87**           | 1*                 | 0                  | 0                  | 0                    | 0                  |
| Orth1       | 162  | 7      | 0 <sup>2</sup> | 1E-04  | 1.0E-04       | 0            | 0       | 0       | 5.7E-04 | 0                  |                    |                        |                    | 2.40E-04          | 0                  | 0                  | 0                  | 0                    | 0                  |
| Orth2       | 126  | 7      | 0.03           | 13.45  | 0.09          | 4.17         | 0.00    | 3.6E-05 | 0       | 0                  |                    |                        |                    | 0                 | 0                  | 4.203*             | 2*                 | 0                    | 0                  |
| Orth16      | 119  | 5      | 0.02           | 7.51   | 0.55          | 0            | 0       | 3.4E-05 | 0       | 0                  |                    | 0.000                  | 0                  | 3.00E-05          | 0                  |                    |                    |                      |                    |
| Orth3       | 104  | 9      | 0.05           | 2.55   | 0.04          | 0            | 1.5E-04 | 1.5E-04 | 2.0E-04 | 0                  |                    | 0                      | 0                  | 0                 | 0                  | 0                  | 0                  |                      |                    |
| Orth17      | 444  | 7      | 0.04           | 2.20   | 0.34          | 39.53**      | 8.76**  | 8.90*   | 8.70*   | 2**/*              | 2*                 |                        |                    | 0                 | 0                  | 0                  | 0                  | 0                    | 0                  |
| Orth4       | 282  | 11     | 0.03           | 2.62   | 0.06          | 14.34*       | 0       | 1.62    | 0       | 1                  |                    | 3.179 <sup>x</sup>     | 1*                 | 0                 | 0                  | 0.339              | 1*                 | 1.61                 | 0                  |
| Orth5       | 441  | 7      | 0.02           | 9.07   | 0.06          | 26.71**      | 6.38*   | 8.69*   | 6.81**  | 1**                | 1**                |                        |                    | 0                 | 0                  | 4.029*             | 1*                 |                      |                    |
| Orth6       | 414  | 9      | 0.04           | 3.11   | 0.35          | 32.60**      | 11.16** | 11.22** | 11.22** | 1**                | 1**                |                        |                    | 2.590             | 0                  | 0                  | 0                  | 0                    | 0                  |
| Orth7       | 267  | 6      | 0.02           | 2.92   | 0.04          | 3.00         | 2.8E-03 | 5.6E-04 | 5.0E-04 | 0                  |                    |                        |                    | 0                 | 0                  | 0                  | 0                  |                      |                    |
| Orth8       | 412  | 8      | 0.05           | 3.05   | 0.07          | 50.80**      | 6.33*   | 2.23    | 1.35    | 1**                | 1**                |                        |                    | 0.883             | 0                  | 0                  | 0                  | 0                    | 0                  |
| Orth9       | 312  | 8      | 0.03           | 5.76   | 1.90          | 0.59         | 3.45    | 3.45    | 3.45    | 0                  |                    |                        |                    | 0                 | 0                  | 4.091*             | 0                  | 0.399                | 0                  |
| Orth10      | 372  | 9      | 0.03           | 5.27   | 0.08          | 5.04         | 0       | 1.2E-04 | 0       | 0                  |                    |                        |                    | 0                 | 0                  | 0.080              | 0                  | 0                    | 0                  |
| Orth11      | 258  | 11     | 0.02           | 1.60   | 0.04          | 10.69*       | 8.0E-06 | 0.81    | 1.6E-05 | 0                  |                    | 0                      | 0                  | 0                 | 0                  | 0                  | 0                  | 0                    | 0                  |
| Orth12      | 120  | 6      | 0.07           | 1.62   | 0.18          | 2.36         | 0.00    | 0.05    | 0.05    | 0                  |                    | 3.715 <sup>x</sup>     | 1**                | 0                 | 0                  | 0                  | 0                  |                      |                    |
| Orth13      | 63   | 5      | 0.03           | 2.06   | 0.09          | 0            | 2E-05   | 2E-05   | 2E-05   | 0                  |                    | 0.000                  | 0                  | 0                 | 0                  |                    |                    | 0                    | 0                  |
| Orth14      | 124  | 10     | 0.77           | 0.63   | 0.17          | 111.77**     | 2.04    | 1.02    | 1.01    | 1**                |                    | 0                      | 0                  | 0                 | 0                  | 0                  | 0                  | 0                    | 0                  |

**Supplementary Table 6:** Summary of Paml (codeml) tests for amino acid sites under selection. Significance: <sup>x</sup> P> 90%; \* P>95%; \*\* P>99%. <sup>2</sup>: no variable sites in Orth1. **n** = number of species with sequences; **bp** =sequence length;  **$\theta$**  = nucleotide diversity; **k** = ratio of transitions to transversions;  **$\omega$  (M0)** = ratio of

synonymous to nonsynonymous substitutions under the M0 model;  $2\Delta l$  is given for each model comparison (Site models; M0:M3; M7:M8 and M8:M8a. Branch models; between a tree with a fixed  $\omega$  across all branches, and one where  $\omega$  is allowed to change on the focal branch), which is twice the difference between the log likelihood of the two nested site-specific models implemented in PAML. **Sig aa sites (BEB)** = number of amino acids detected under positive selection under a Bayes Empirical Bayes model.
